# Supplementary material for: Serum metabolic profiling in pregnant Holstein cows 3 weeks prior to parturition using two-dimensional gas chromatography time-of-flight mass spectrometry
Source: PubMed Central journal article supplement — J Vet Med Sci. 2024 Apr 22;86(6):606–11. doi: 10.1292/jvms.24-0091 (PMC11187593; doi:10.1292/jvms.24-0091), 2024-04-22
Supplement: jvms-86-606-s001.pdf [file jvms-86-606-s001.pdf]

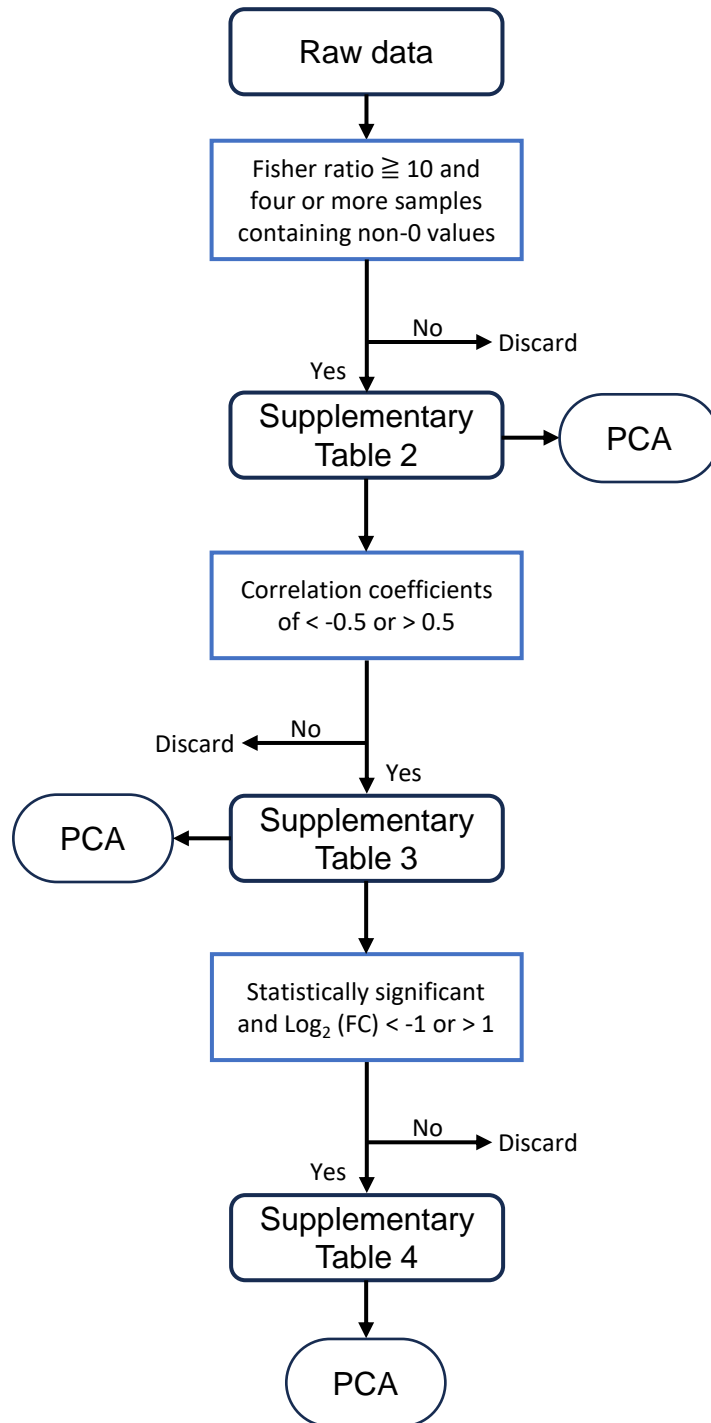

Supplementary Fig. 1. An overview of the data processing and analyses. PCA, principal component analysis; FC, fold change

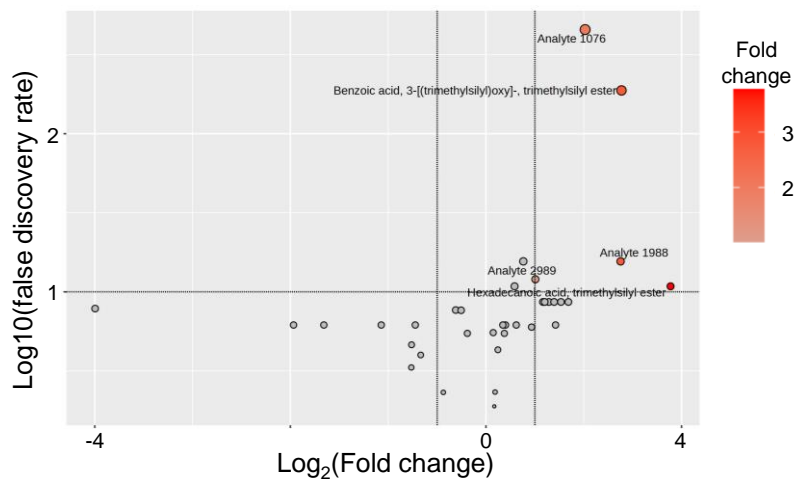

Supplementary Fig. 2. Volcano plot of the serum metabolic profiles comparing the MF and normal groups.

The red and blue dots represent the up- and down-regulated metabolites in the MF group compared to the normal group. The two vertical lines indicate the  $\log_2$  (fold change)  $\pm 1$ . The horizontal dotted line indicates the false discovery rate cutoff of  $<0.05$ .

Supplementary Table 1. Serum calcium concentrations of the 25 cows.

| ID    | Health category (Diagnosis) | Serum calcium (mg/dL) | Date of postparturient collected serum |
|-------|-----------------------------|-----------------------|----------------------------------------|
| cow1  | MF                          | 3.6                   | -22                                    |
| cow2  | MF                          | 5.4                   | -20                                    |
| cow3  | Normal                      | 7.9                   | -23                                    |
| cow4  | Normal                      | 6.4                   | -23                                    |
| cow5  | MF                          | 4.5                   | -18                                    |
| cow6  | MF                          | 4                     | -20                                    |
| cow7  | Normal                      | 7.1                   | -20                                    |
| cow8  | Normal                      | 7.3                   | -23                                    |
| cow9  | Normal                      | 6.4                   | -22                                    |
| cow10 | Normal                      | 9.3                   | -22                                    |
| cow11 | Normal                      | 8.1                   | -21                                    |
| cow12 | Normal                      | 6.6                   | -23                                    |
| cow13 | Normal                      | 6.3                   | -20                                    |
| cow14 | Normal                      | 8.7                   | -20                                    |
| cow15 | Normal                      | 7.6                   | -19                                    |
| cow16 | MF                          | 5                     | -19                                    |
| cow17 | Normal                      | 7.9                   | -19                                    |
| cow18 | Normal                      | 6.7                   | -21                                    |
| cow19 | Normal                      | 8.8                   | -19                                    |
| cow20 | MF                          | 5.6                   | -20                                    |
| cow21 | MF                          | 4.8                   | -19                                    |
| cow22 | MF                          | 5.4                   | -21                                    |
| cow23 | Normal                      | 7.5                   | -22                                    |
| cow24 | Normal                      | 7.8                   | -21                                    |
| cow25 | Normal                      | 10.3                  | -20                                    |





































Supplementary Table 3. The serum compounds with a correlation coefficient of more than 0.5 or less than -0.5 with serum calcium concentrations in the 25 cows.

| 1st    | 2nd | Compounds                                                             | correlation coefficient |
|--------|-----|-----------------------------------------------------------------------|-------------------------|
| 455.6  | 1.2 | Analyte 214                                                           | -0.51                   |
| 502.6  | 1.0 | Disiloxane, hexamethyl-                                               | 0.51                    |
| 505.0  | 0.9 | Analyte 431                                                           | -0.54                   |
| 568.3  | 0.9 | Disiloxane, hexamethyl-                                               | 0.51                    |
| 595.3  | 1.3 | Methylenecyclopropane, 2-(1-hydroxyethyl)-2-trimethylsilyl-           | -0.55                   |
| 599.0  | 1.5 | Analyte 664                                                           | -0.52                   |
| 640.0  | 1.2 | 2-Methyl-1,3-propanediol 2TMS                                         | 0.51                    |
| 675.5  | 1.4 | Propanoic acid, 2-(methoxyimino)-, trimethylsilyl ester               | -0.50                   |
| 691.3  | 1.3 | Analyte 814                                                           | 0.50                    |
| 709.6  | 1.3 | Analyte 869                                                           | -0.59                   |
| 790.1  | 1.4 | Butanoic acid, 2-methyl-2-[(trimethylsilyloxy)-, trimethylsilyl ester | -0.52                   |
| 816.3  | 1.5 | Analyte 1039                                                          | -0.56                   |
| 820.5  | 1.4 | Silane, trimethyl(3-methylphenoxy)-                                   | -0.56                   |
| 833.4  | 1.4 | Butanoic acid, 2-[(trimethylsilyloxy)-, trimethylsilyl ester          | -0.57                   |
| 835.8  | 1.0 | Analyte 1076                                                          | -0.60                   |
| 875.7  | 2.1 | Monomethylphosphate 2TMS                                              | -0.56                   |
| 1012.1 | 0.9 | Acetamide, 2,2,2-trifluoro-N-methyl-                                  | 0.55                    |
| 1047.2 | 3.0 | Analyte 1590                                                          | -0.51                   |
| 1231.9 | 1.6 | Analyte 1900                                                          | 0.51                    |
| 1232.1 | 0.9 | Analyte 1894                                                          | 0.54                    |
| 1257.4 | 1.6 | Analyte 1953                                                          | -0.51                   |
| 1282.2 | 1.4 | Analyte 1988                                                          | -0.55                   |
| 1294.3 | 1.7 | Analyte 2007                                                          | 0.59                    |
| 1373.8 | 1.5 | Benzoic acid, 3-[(trimethylsilyloxy)-, trimethylsilyl ester           | -0.55                   |
| 1423.9 | 1.4 | Analyte 2212                                                          | 0.50                    |
| 1440.3 | 1.4 | Analyte 2245                                                          | -0.54                   |
| 1475.3 | 1.9 | Analyte 2286                                                          | -0.51                   |
| 1675.6 | 1.6 | Analyte 2619                                                          | -0.50                   |
| 1710.0 | 1.6 | Hexadecanoic acid, trimethylsilyl ester                               | -0.57                   |
| 1733.5 | 1.3 | Analyte 2806                                                          | -0.51                   |
| 1795.3 | 1.7 | Analyte 2974                                                          | 0.55                    |
| 1801.0 | 1.6 | Analyte 2989                                                          | -0.54                   |
| 1803.9 | 2.5 | Analyte 3004                                                          | 0.55                    |
| 2491.5 | 1.6 | Analyte 4019                                                          | -0.52                   |
| 2590.0 | 0.9 | Analyte 4279                                                          | 0.51                    |

1st: The retention time on the first column

2nd: The retention time on the second column

Analytes mean unidentified compounds.

Supplementary Table 4. The serum compounds with statistically significant and two-fold larger or half-fold smaller in the 25 cows.

| 1st    | 2nd | Compounds                                                    | Fold Change |
|--------|-----|--------------------------------------------------------------|-------------|
| 835.8  | 1.0 | Analyte 1076                                                 | 4.1         |
| 1282.2 | 1.4 | Analyte 1988                                                 | 6.7         |
| 1373.8 | 1.5 | Benzoic acid, 3-[(trimethylsilyl)oxy]-, trimethylsilyl ester | 6.8         |
| 1710.0 | 1.6 | Hexadecanoic acid, trimethylsilyl ester                      | 13.7        |
| 1801.0 | 1.6 | Analyte 2989                                                 | 2.0         |

1st: The retention time on the first column

2nd: The retention time on the second column

Analytes mean unidentified compounds.
